# Supplementary material
Source: PubMed Central journal article supplement (PMC2732037)
Supplement: 97320630003409S1.pdf [file 97320630003409S1.pdf]

## Supplementary material

| S. No. | Species                | Number of Protein Sequences |
|--------|------------------------|-----------------------------|
| 1      | <i>H. sapiens</i>      | 27970                       |
| 2      | <i>P. triglodytes</i>  | 51931                       |
| 3      | <i>C. familiaris</i>   | 33654                       |
| 4      | <i>B. taurus</i>       | 24853                       |
| 5      | <i>M. musculus</i>     | 26657                       |
| 6      | <i>G. gallus</i>       | 18532                       |
| 7      | <i>D. melanogaster</i> | 19765                       |
| 8      | <i>A. mellifera</i>    | 9257                        |
| 9      | <i>A. gambiae</i>      | 12659                       |
| 10     | <i>D. rerio</i>        | 34438                       |
| 11     | <i>C. elegans</i>      | 19568                       |
| 12     | <i>A. thaliana</i>     | 31711                       |
| 13     | <i>S. cerevisiae</i>   | 5880                        |
| 14     | <i>Influenza virus</i> | 8916                        |
| 15     | <i>P. falciparum</i>   | 5267                        |

**Table 1:** Total number of protein sequences taken for study in each species.
